# Supplementary material for: Timing Does Matter: Nerve-Mediated HDAC1 Paces the Temporal Expression of Morphogenic Genes During Axolotl Limb Regeneration
Source: PubMed Central journal article supplement (PMC8143519; doi:10.3389/fcell.2021.641987), 2021-05-10
Supplement: Data_Sheet_1.pdf [file Data_Sheet_1.pdf]

## Supporting information

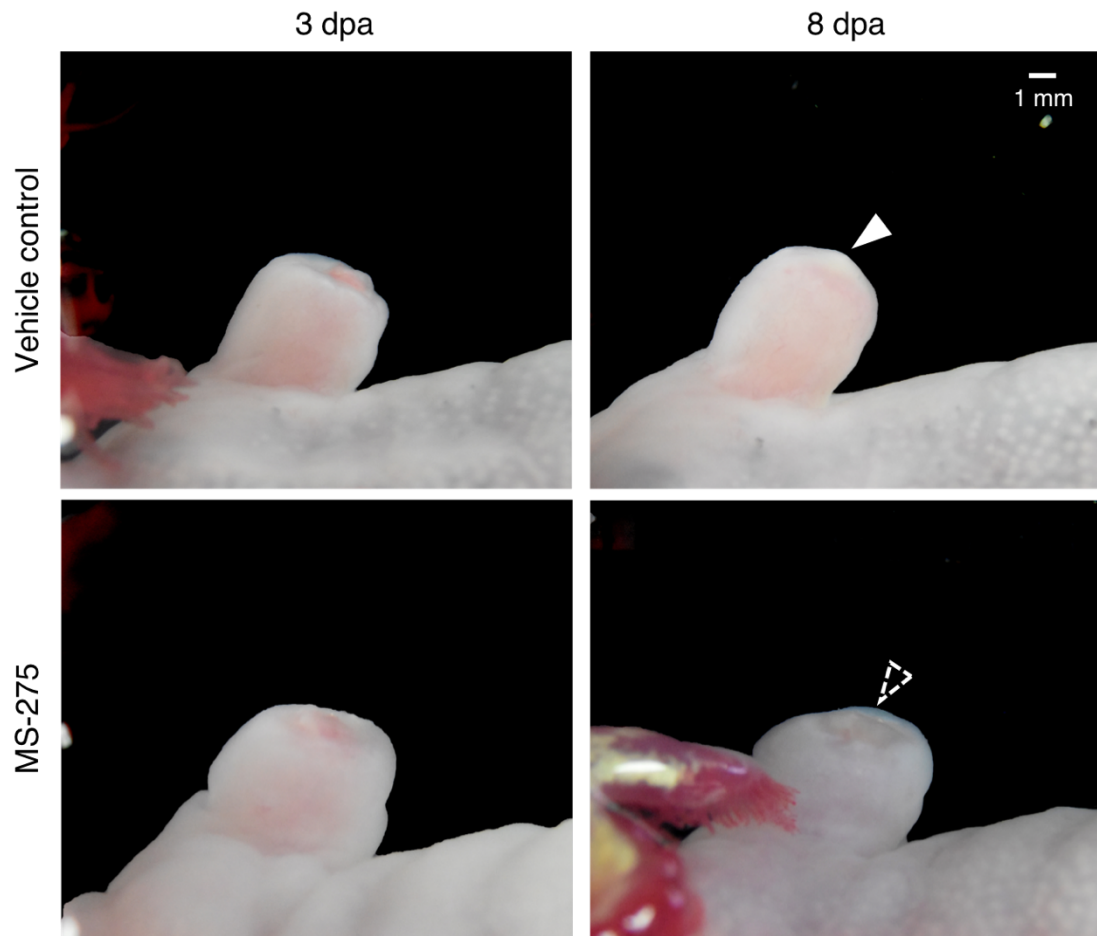

**Supplementary Figure S1. The absence of early bud blastema formation induced by MS-275.** Representative bright-field images showing the absence of blastema outgrowth at 8 dpa. The solid and dashed arrows indicate the blastema and the amputation plane, respectively. Scale bars: 1 mm.

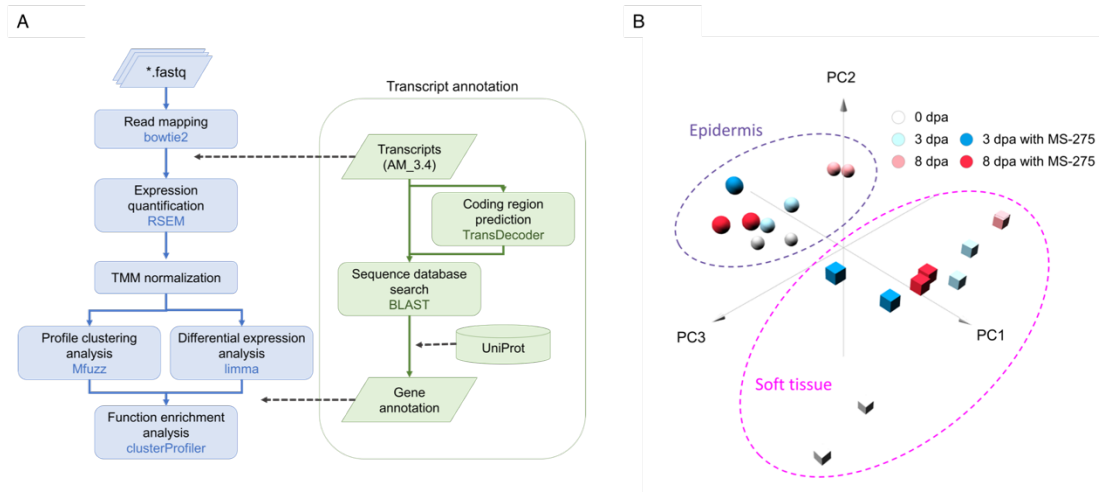

**Supplementary Figure S2. Comparative analysis of transcriptome profiles.** (A) Flowchart of the method used for the analysis of RNA-seq data and reannotation of the reference transcriptome of axolotl (Nowoshilow et al., 2018). (B) 3D projection plot of PCA of transcriptome profiles generated from this study.

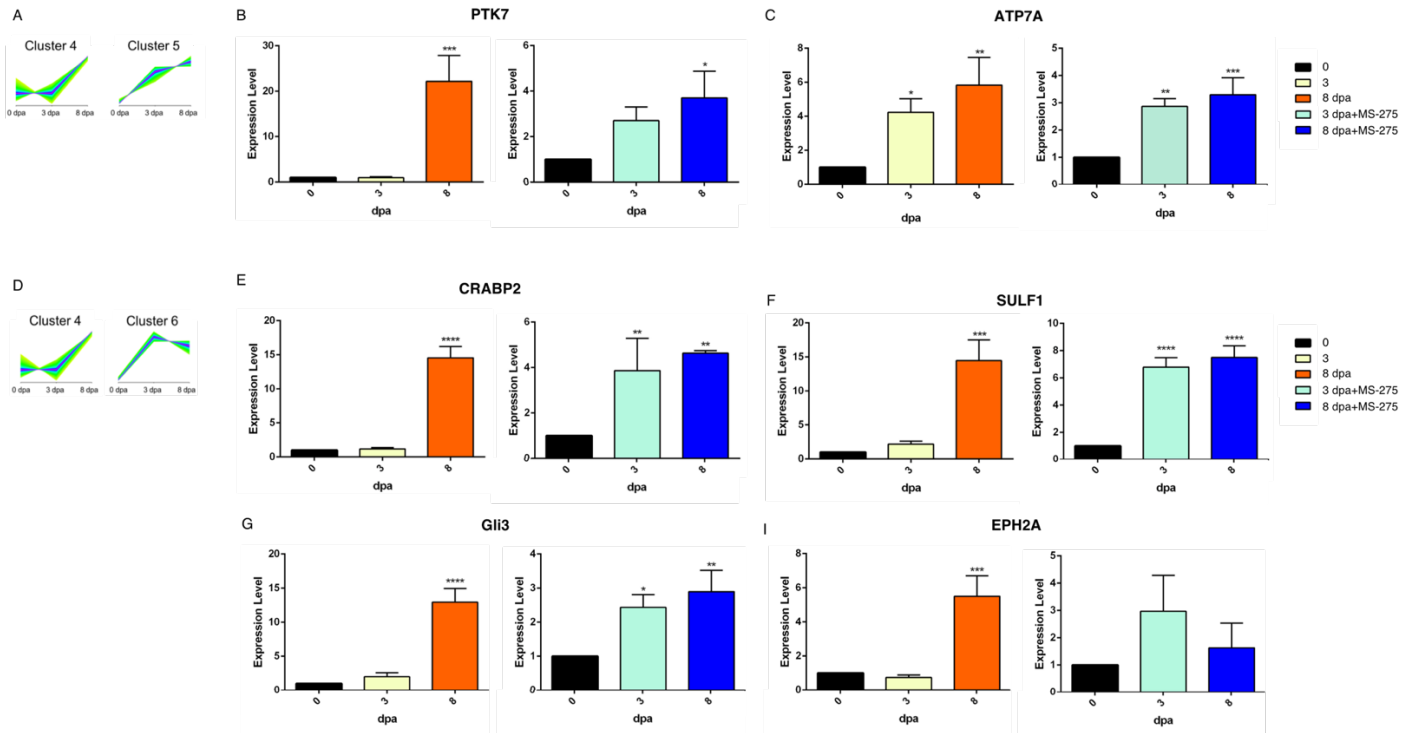

**Supplementary Figure S3. Validation of transcripts in cluster transition by Q-PCR.** (A) The trends in expression patterns from clusters 4 to 5 at 0, 3 and 8 dpa. (B and C) The expression of genes highlighted in Figure 3G was examined. (D) The trends in expression patterns from clusters 4 to 6 at 0, 3 and 8 dpa. (E-I) The expression of genes highlighted in Figure 3G was examined. The data are expressed as the means  $\pm$  SEMs;  $n = 3$  per group (3 biological repeats consisting of 4 arms from 2 animals per RNA sample; a total of 120 amputation/regeneration sites were studied). \* $P < 0.05$ .

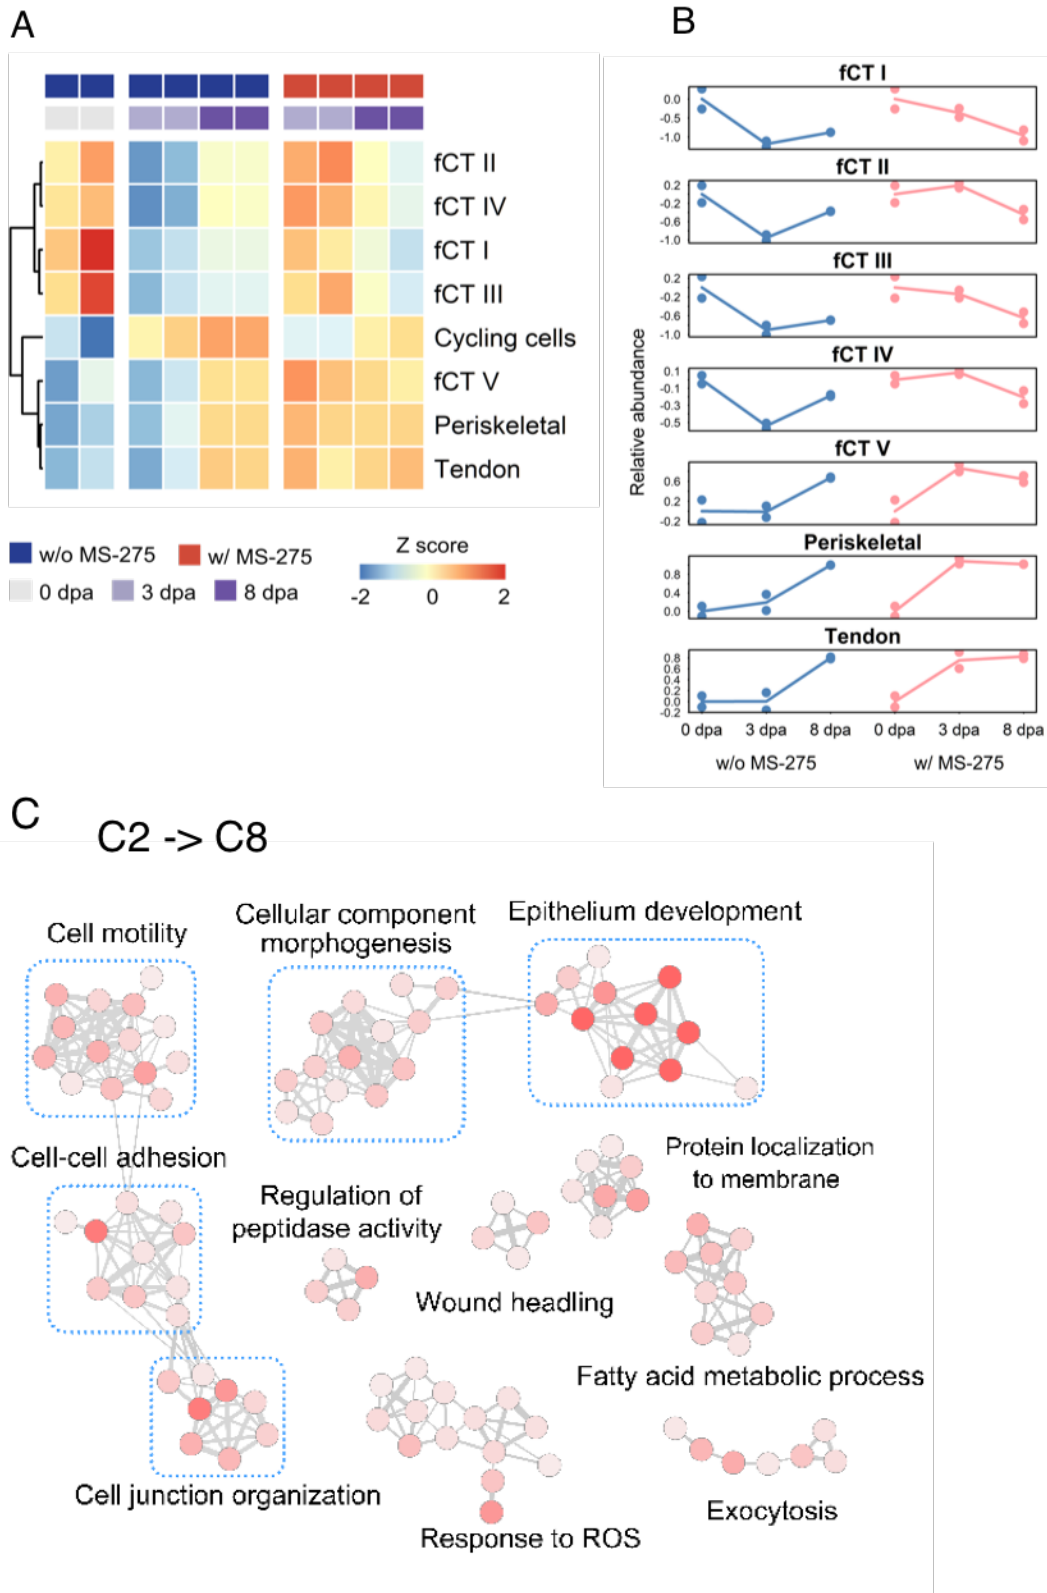

**Supplementary Figure S4. The deduced HDAC1 inhibition-associated cell composition changes based on the expression patterns of signature genes of specific connective tissue (CT) cell types in the ST during early limb regeneration. (A) The heatmap shows the predicted relative abundance of various CT cells estimated**

from the abundance of cell type-specific enriched signatures (red: high; blue: low). (B) MS-275 induced significant changes in the early regeneration stage-associated expression pattern of cell type-specific enriched gene cohorts. (C) Enrichment maps of gene sets significantly enriched ( $FDR < 0.05$ ) by genes whose expression transitions from cluster 2 to cluster 8 after MS-275 exposure, exhibiting similar pattern changes observed from the cell type representative genes in fCT I, fCT II, fCT III, and fCT IV, as shown in (B). The red to white color gradient for each GO node indicates the significance of the enrichment for that particular GO term (red being more significant).

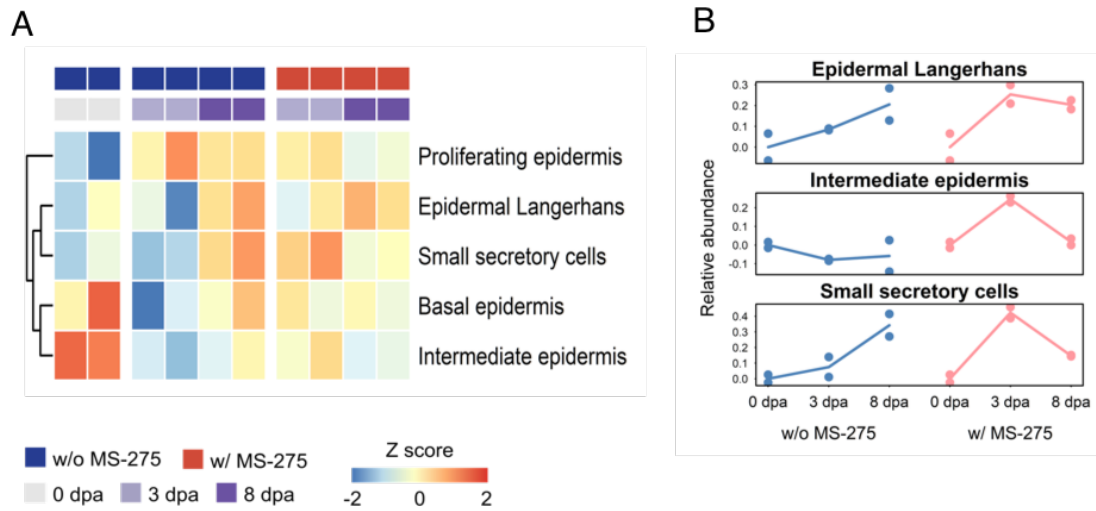

**Supplementary Figure S5. The deduced possible cell composition shift in WE under MS-275 treatment during the early stage of limb regeneration.** The putative abundance of epidermal cell types during WE exposure with or without MS-275 treatment. (A) The heatmap shows the predicted relative abundance of various epidermal cells estimated by the abundance of cell type-specific enriched signatures (red: high; blue: low). (B) The panel on the right demonstrates the premature enrichment of the deduced representation of epidermal Langerhans, intermediate epidermis and small secretory cells under MS-275 treatment.

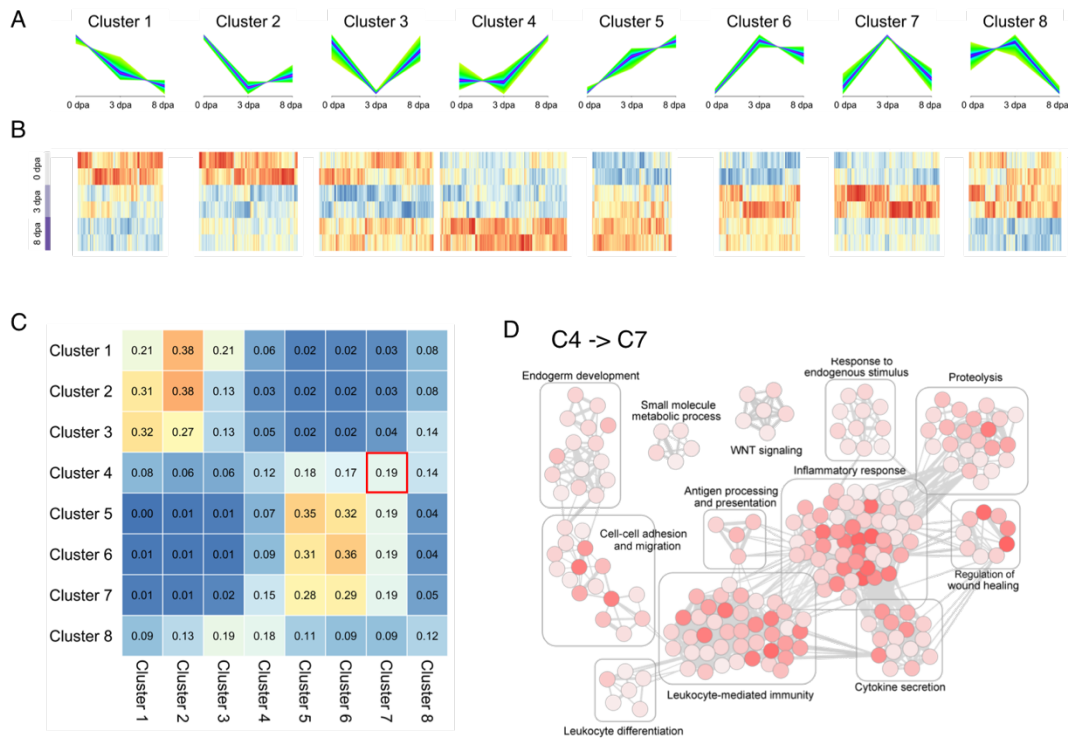

**Supplementary Figure S6. Highlighted GO categories for genes that undergo expression-pattern transition in response to MS-275 treatment in epidermis.** (A) Unsupervised clustering of transcripts based on the trends in their expression patterns during normal regeneration at 0, 3 and 8 dpa. (B) The heatmap of the relative expression level of transcripts associated with each cluster. Transcript datasets from the epidermis of each stage without MS-275 treatment are shown for comparison. (C) The cluster transition matrix shows the proportion of genes in each given cluster (row) that exhibited changes in their expression pattern to those of other clusters (column) after MS-275 treatment. (D) Enrichment maps of gene sets significantly enriched (FDR < 0.05) by genes whose expression transitioned them from cluster 4 to cluster 7 after MS-275 exposure.

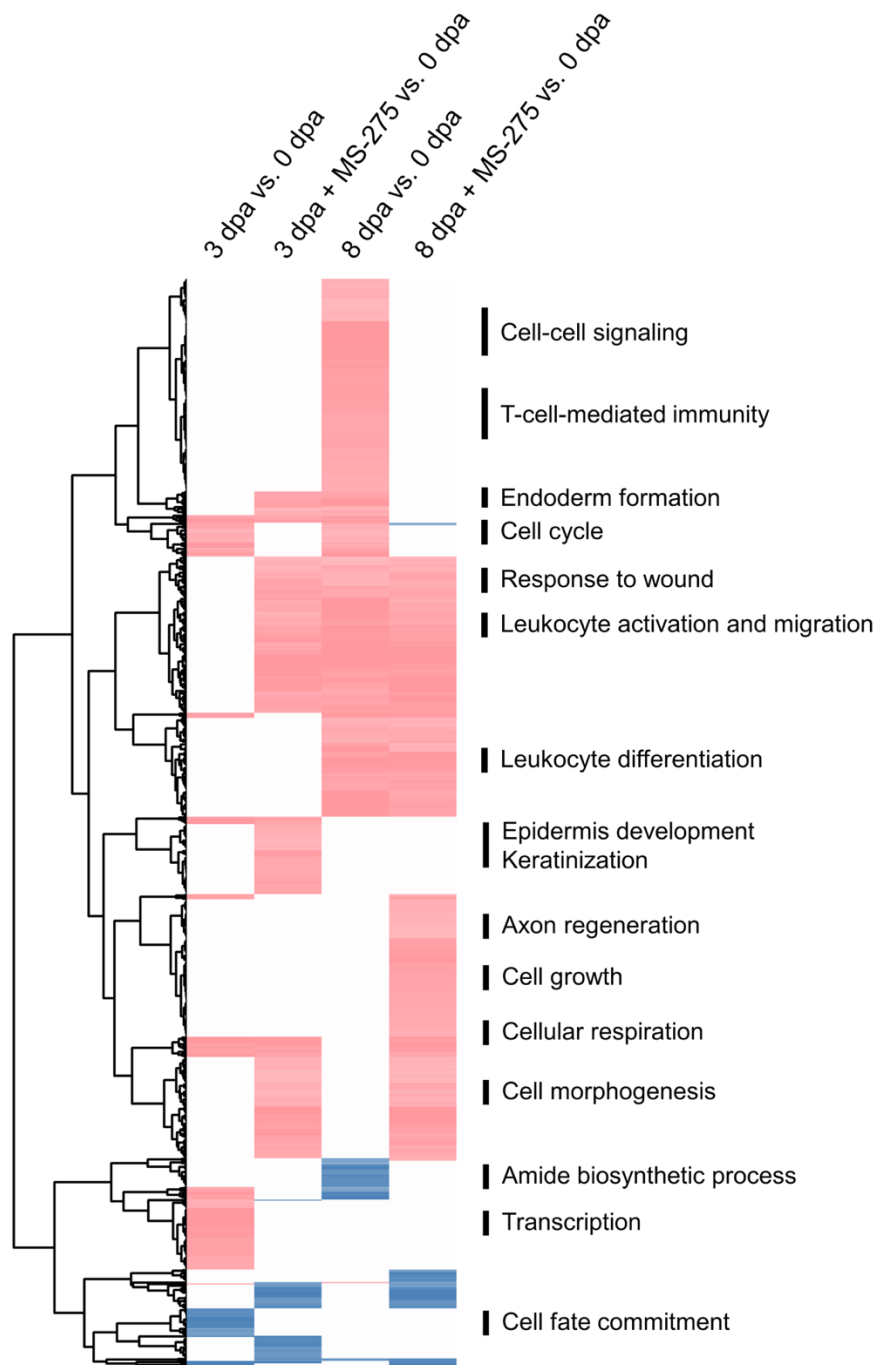

**Supplementary Figure S7. Premature or aberrant enrichment of specific GO terms in epidermal tissue under MS-275 treatment.** The heatmap shows the results of GSEA at 3 dpa vs. 0 dpa or 8 dpa vs. 0 dpa with or without MS-275 treatment on gene sets defined by Gene Ontology. Red and blue indicate the gene sets significantly positively (red) and negatively (blue) enriched, respectively, at 3 or 8 dpa (FDR < 0.05), and the intensity is associated with the normalized enrichment score (NES)



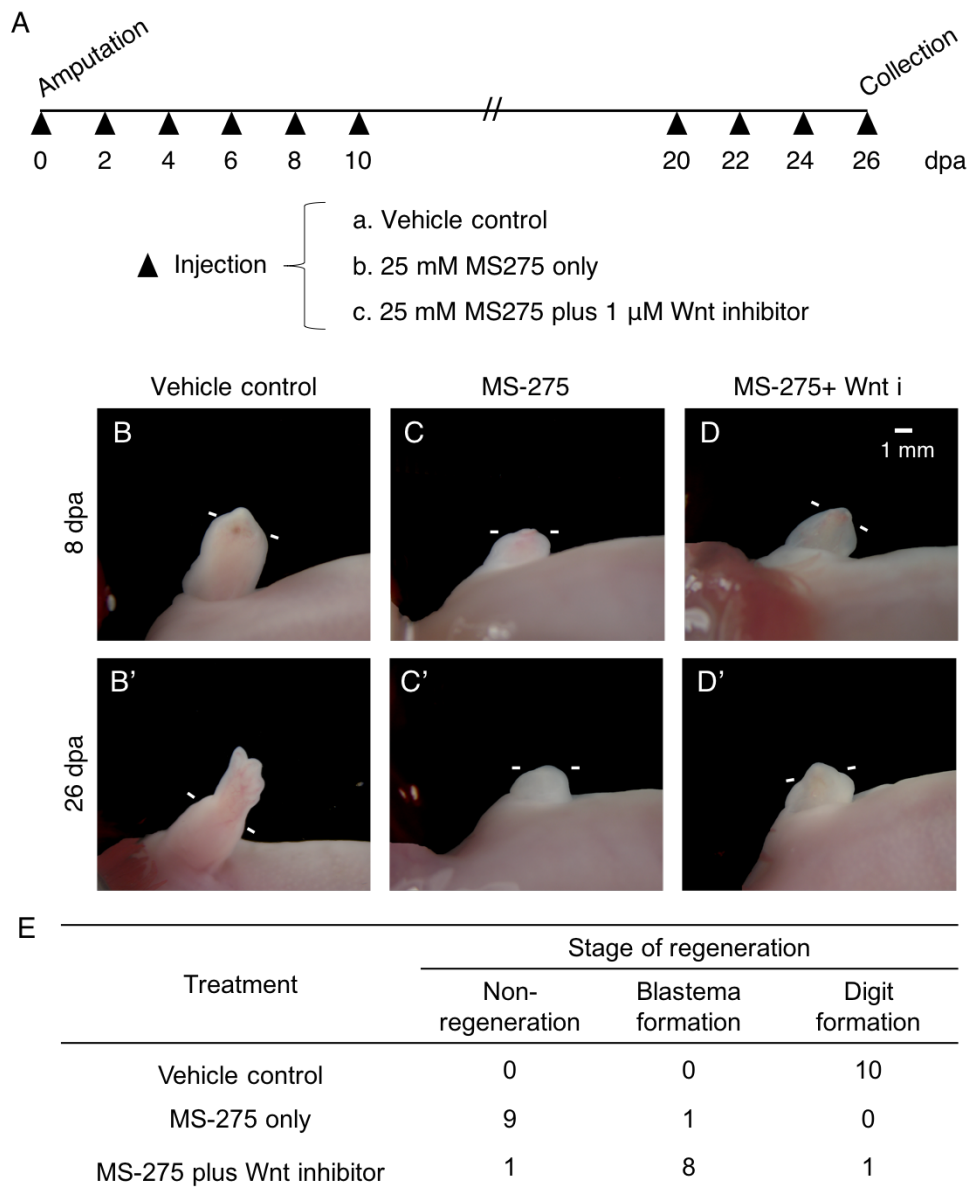

**Supplementary Figure S8. Partial rescue of MS-275–induced regeneration inhibition by a Wnt inhibitor.** (A) Experimental protocol indicating the timing of local injection (every other day) from amputation until 26 dpa. There were 3 injection groups: (a) the vehicle control, (b) 25 mM MS-275 alone, and (c) 25 mM MS-275 plus 1  $\mu$ M Wnt inhibitor groups. Representative photos at 8 dpa showing blastema formation in group a (B), a lack of regeneration in group b (C), and a smaller blastema in group c (D). At 26 dpa, a new limb formed with four digits in group a (B'), there was no regeneration in group b (C'), and a blastema was observed in group c (D'). (E) A table showing the final outcomes for these 3 groups at 26 dpa. N=10 limbs in each group. The white bars indicate the amputation line. Scale bar= 1 mm.

**Supplementary Table S1. Summary of the sequencing read alignment to the reference transcripts**

| <b>Sample name</b> | <b># of reads</b> | <b>Overall alignment rate</b> |
|--------------------|-------------------|-------------------------------|
| D3-ST-1            | 22,557,069        | 78.64%                        |
| D3-ST-2            | 36436803          | 80.59%                        |
| D3-ST-M1           | 19284219          | 76.49%                        |
| D3-ST-M2           | 28457400          | 77.32%                        |
| D3-WE-1            | 35204053          | 77.21%                        |
| D3-WE-2            | 40040745          | 76.47%                        |
| D3-WE-M1           | 38514305          | 77.14%                        |
| D3-WE-M2           | 34524802          | 75.96%                        |
| D8-ST-1            | 38603215          | 79.13%                        |
| D8-ST-2            | 30457341          | 79.43%                        |
| D8-ST-M1           | 32595534          | 78.19%                        |
| D8-ST-M2           | 42965033          | 80.49%                        |
| D8-WE-1            | 30721211          | 79.38%                        |
| D8-WE-2            | 35942941          | 78.26%                        |
| D8-WE-M1           | 46718700          | 77.71%                        |
| D8-WE-M2           | 34046014          | 78.87%                        |
| O-ST-1             | 46463921          | 78.69%                        |
| O-ST-2             | 27450973          | 80.87%                        |
| O-WE-1             | 41412254          | 88.23%                        |
| O-WE-2             | 35303186          | 78.49%                        |

**Supplementary Table S2. Numbers of differentially expressed genes from each comparison**

|                                      | Epidermis | Soft tissue |
|--------------------------------------|-----------|-------------|
| 3 dpa vs. 0 dpa                      | 16,413    | 22,413      |
| 8 dpa vs. 0 dpa                      | 16,677    | 24,892      |
| 8 dpa vs. 3 dpa                      | 14,074    | 12,255      |
| 3 dpa w/MS-275 vs. 0 dpa             | 23,176    | 23,544      |
| 8 dpa w/MS-275 vs. 0 dpa             | 23,053    | 23,981      |
| 8 dpa w/MS-275 vs.<br>3 dpa w/MS-275 | 11,087    | 10,855      |

**Supplementary Table S3. Matrix illustrating the number of genes exhibiting gene expression trajectory changes after MS-275 treatment (reference for Figure 3C,D,F,H).**

|         |           | MS-275 treatment |           |           |           |           |           |           |           |
|---------|-----------|------------------|-----------|-----------|-----------|-----------|-----------|-----------|-----------|
|         |           | Cluster 1        | Cluster 2 | Cluster 3 | Cluster 4 | Cluster 5 | Cluster 6 | Cluster 7 | Cluster 8 |
| Control | Cluster 1 | 1977             | 2425      | 661       | 69        | 43        | 84        | 316       | 669       |
|         | Cluster 2 | 1872             | 1399      | 509       | 78        | 40        | 70        | 394       | 1257      |
|         | Cluster 3 | 765              | 751       | 629       | 169       | 97        | 188       | 727       | 1038      |
|         | Cluster 4 | 155              | 159       | 446       | 717       | 877       | 1360      | 1463      | 320       |
|         | Cluster 5 | 5                | 21        | 108       | 590       | 1955      | 2045      | 727       | 65        |
|         | Cluster 6 | 14               | 24        | 102       | 570       | 2192      | 1540      | 537       | 49        |
|         | Cluster 7 | 31               | 42        | 154       | 554       | 868       | 766       | 630       | 104       |
|         | Cluster 8 | 296              | 465       | 543       | 201       | 107       | 174       | 293       | 302       |

**Supplementary Table S4. Matrix illustrating the number of genes exhibiting gene expression trajectory changes after MS-275 treatment (reference for Supplementary Figure S6C-D).**

Epidermis

|         |           | MS-275 treatment |           |           |           |           |           |           |           |
|---------|-----------|------------------|-----------|-----------|-----------|-----------|-----------|-----------|-----------|
|         |           | Cluster 1        | Cluster 2 | Cluster 3 | Cluster 4 | Cluster 5 | Cluster 6 | Cluster 7 | Cluster 8 |
| Control | Cluster 1 | 906              | 1639      | 912       | 245       | 77        | 108       | 118       | 354       |
|         | Cluster 2 | 1540             | 1912      | 632       | 169       | 100       | 89        | 131       | 401       |
|         | Cluster 3 | 1852             | 1531      | 714       | 277       | 139       | 138       | 255       | 802       |
|         | Cluster 4 | 489              | 354       | 406       | 766       | 1155      | 1051      | 1163      | 887       |
|         | Cluster 5 | 15               | 33        | 59        | 303       | 1445      | 1307      | 770       | 171       |
|         | Cluster 6 | 22               | 25        | 37        | 356       | 1289      | 1487      | 791       | 159       |
|         | Cluster 7 | 57               | 60        | 130       | 780       | 1473      | 1524      | 981       | 286       |
|         | Cluster 8 | 427              | 599       | 905       | 863       | 509       | 425       | 425       | 556       |

**Supplementary Table S5. Primer sequences for Q-PCR**

| <b>Gene</b>                  | <b>Forward</b>          | <b>Reverse</b>           |
|------------------------------|-------------------------|--------------------------|
| <i>sulf1</i>                 | GACGCACCAAGTTTGTCCAA    | TGGTCACTTCATCTGCCGAA     |
| <i>atp7a</i>                 | CAGCCGCTATAGGTACTCCAATA | TTGTTGGATGTGGTGGCAAG     |
| <i>ptk7</i>                  | GGGTCACTGTGTTTGCCAAT    | CATGTCCTTGATGTCTGCGA     |
| <i>crabp2</i>                | AATCAGGCCAGCATTGTCCA    | GCAGACTGAGTCCACATACAGGAA |
| <i>gli3</i>                  | CACTCTCCGATCACAGCTTTGA  | TAAGTGACCGTATGACCCACTAGC |
| <i>epha2</i>                 | CGTAGACTATGGCACCAACTTC  | CACCTCCACGTTTAGCTTCA     |
| <i>S21</i> ribosomal<br>RNA* | ACTTGAAGTTTGTGTCAGGAC   | TGGCATCTTCTATGATCCCATC   |

\* served as an internal control.

## **Lists of additional files**

**Additional file A** Supplementary Matrix to Soft Tissue GSEA analysis based on each gene ontology (reference for Figure 2)

**Additional file B.** Soft tissue DEGs between each regeneration stage/treatment vs. homeostatic control.

**Additional file C.** Mfuzz cluster Transition in ST, including P value and gene list for highlighted GO term from each cluster switch (Reference for Figure 3 and Supplementary Table S3).

**Additional file D.** Signature genes enriched for each connective tissue cell type

**Additional file E.** Signature genes enriched for each epidermal cell types.

**Additional file F.** Epidermis DEGs between each regeneration stage/treatment vs. homeostatic control.

**Additional file G.** Mfuzz cluster Transition in epidermis, including P value and gene list for highlighted GO term from each cluster switch (Reference for Supplementary Figure S6C-D and Supplementary Table S4).

**Additional file H** Supplementary Matrix to Epidermis GSEA analysis based on each gene ontology (reference for Supplementary Figure S7)

**Additional file I.** The in-house developed scripts for the present study.
